# Supplementary material for: Extensive Cotransformation of Natural Variation into Chromosomes of Naturally Competent Haemophilus influenzae
Source: PubMed Central journal article supplement (PMC4059242; doi:10.1534/g3.113.009597), 2014-02-25
Supplement: supp_g3.113.009597_FigureS1.pdf [file supp_g3.113.009597_FigureS1.pdf]

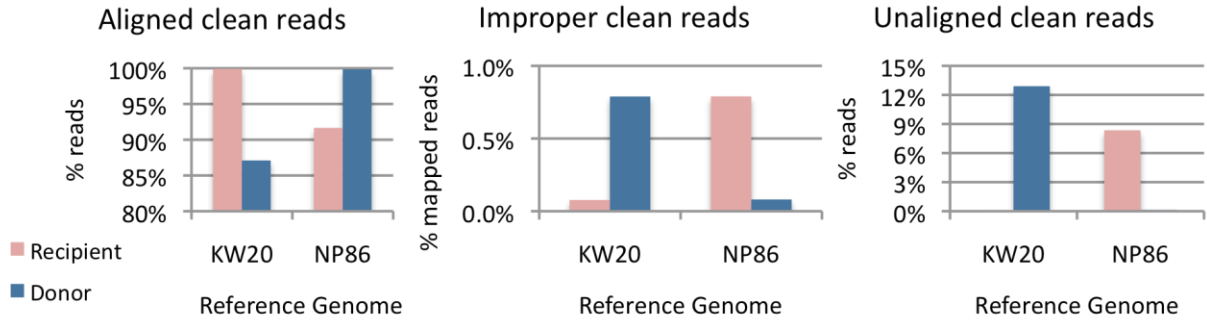

**Figure S1** Summary of read alignments to the two references. Percent of control reads post-adaptor trimming that: (A) mapped with proper pairing, (B) mapped with improper pairing, and (C) remained unmapped.
