# Supplementary material for: Extensive Cotransformation of Natural Variation into Chromosomes of Naturally Competent Haemophilus influenzae
Source: PubMed Central journal article supplement (PMC4059242; doi:10.1534/g3.113.009597), 2014-02-25
Supplement: supp_g3.113.009597_FigureS3.pdf [file supp_g3.113.009597_FigureS3.pdf]

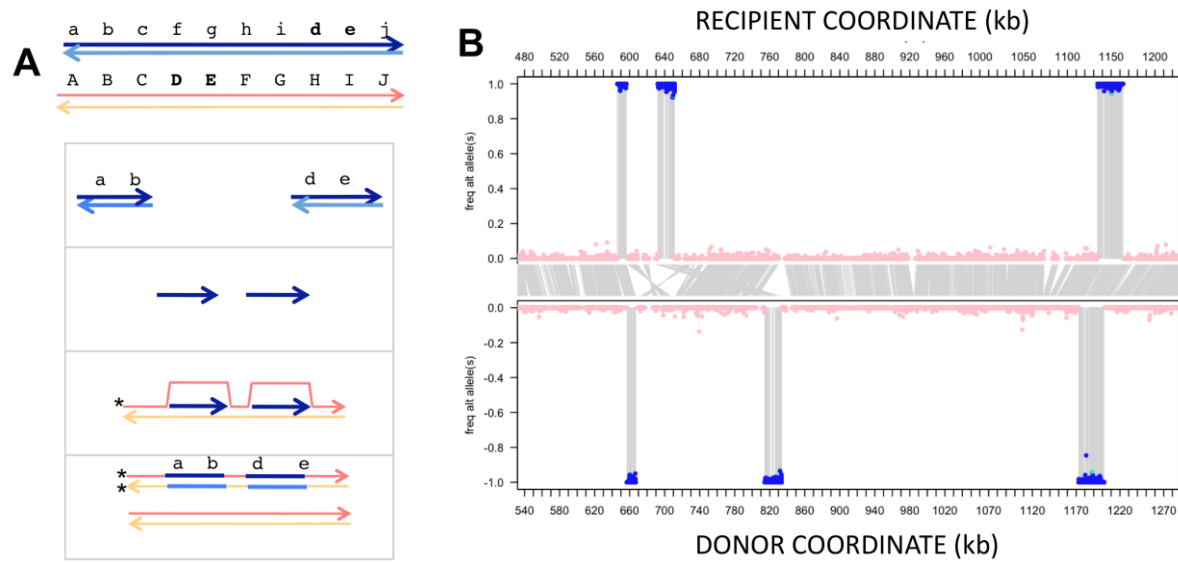

**Figure S3** Spurious clustering of two segments in RR4049. **(A)** Schematic of inferred transformation intermediates. **(B)** Plot of donor-specific allele frequency against the recipient genome (top panel) and the donor genome (bottom panel); connecting lines between the plots show all syntenic SNV positions connecting the two references. The two donor segments in the top left appear to be ~50 kb apart but were derived from segments ~150 kb apart. A very similar pattern was seen for RR4050.
